# Supplementary material
Source: HighWire-hosted journal article supplement (https://bjo.bmj.com/content/103/12/1803)
Supplement: inline-supplementary-material-1 [file inline-supplementary-material-1.pdf]

**Supplementary table 1: Odds ratio of myopia, controlling for age group, for socio-demographic and lifestyle risk factors in the Ireland Eye Study**

| <b>Risk Factor (response rate %)</b>  | <b>Myopic n/total N</b> | <b>(%)</b> | <b>Odds Ratio (95% CI)</b> | <b>P value</b>   |
|---------------------------------------|-------------------------|------------|----------------------------|------------------|
| <b>Demographics</b>                   |                         |            |                            |                  |
| <b>Age group (100%)</b>               |                         |            |                            |                  |
| 6-7 years                             | 27/728                  | (3.7)      | Ref                        |                  |
| 12-13 years                           | 205/898                 | (22.8)     | 7.68 (5.07 – 11.63)        | <b>&lt;0.001</b> |
| <b>Gender (100%)</b>                  |                         |            |                            |                  |
| Male (881)                            | 124/881                 | (14.1)     | Ref                        | 0.83             |
| Female (745)                          | 108/745                 | (14.5)     | 1.035 (0.78 -1.37)         |                  |
| <b>Ethnicity (100%)</b>               |                         |            |                            |                  |
| White                                 | 155/1290                | (12.0)     | 0.27 (0.19 - 0.40)         | <b>&lt;0.001</b> |
| Traveller                             | 20/151                  | (13.2)     | 0.30 (0.16, 0.54)          | <b>&lt;0.001</b> |
| Non-white                             | 57/185                  | (30.8)     | Ref                        |                  |
| <b>Socioeconomic status (100%)</b>    |                         |            |                            |                  |
| Disadvantaged                         | 37/353                  | (10.5)     | 1.15 (0.77 – 1.72)         | 0.49             |
| Advantaged                            | 195/1273                | (15.3)     | Ref                        |                  |
| <b>Living environment (100%)</b>      |                         |            |                            |                  |
| Urban                                 | 182/1119                | (16.3)     | 0.90 (0.62 – 1.29)         | 0.56             |
| Rural                                 | 50/507                  | (9.9)      | Ref                        |                  |
| <b>Afterschool activities (98.3%)</b> |                         |            |                            |                  |
| Mainly on phone/screens (sedentary)   | 50/194                  | (25.8)     | 2.90 (1.90 – 4.44)         | <b>&lt;0.001</b> |
| Infrequent activity                   | 41/345                  | (11.9)     | 1.67 (1.08 – 2.57)         | <b>0.02</b>      |

|                                                         |         |        |                     |                  |
|---------------------------------------------------------|---------|--------|---------------------|------------------|
| Sporting activities up to 3 hours/per week              | 60/463  | (13.0) | 1.43 (0.98 – 2.09)  | 0.06             |
| Sporting activities >3 hours per week                   | 74/596  | (12.4) | Ref                 |                  |
| <b>Near work time close work (98.2%)</b>                |         |        |                     |                  |
| Most time close work                                    | 7/36    | (19.4) | 3.00 (1.13 – 8.00)  | <b>0.02</b>      |
| Frequent close work                                     | 87/551  | (15.8) | 2.20 (1.37 – 3.50)  | <b>0.001</b>     |
| Occasional close work                                   | 102/766 | (13.3) | 1.60 (0.98 – 2.50)  | 0.06             |
| Little close work                                       | 28/243  | (11.5) | Ref                 |                  |
| <b>Homework time (per day) (98.1%)</b>                  |         |        |                     |                  |
| None                                                    | 3/19    | (15.8) | 0.80 (0.21 – 3.07)  | 0.74             |
| An hour or less                                         | 76/894  | (8.5)  | 0.72 (0.43 – 1.23)  | 0.23             |
| 1-2 hours                                               | 114/575 | (19.8) | 0.76 (0.47 – 1.23)  | 0.27             |
| >2 hours                                                | 28/104  | (26.9) | Ref                 |                  |
| <b>Screen-time (hours per day) (98.5%)</b>              |         |        |                     |                  |
| Less than 1 hour                                        | 26/313  | (8.3)  | 0.27 (0.16 - 0.47)  | <b>&lt;0.001</b> |
| 1-3 hours                                               | 83/707  | (11.7) | 0.51 (0.34 – 0.77)  | <b>0.001</b>     |
| More than 3 hours                                       | 118/582 | (20.3) | Ref                 |                  |
| <b>Daylight exposure winter (hours per day) (98.0%)</b> |         |        |                     |                  |
| Less than 1 hour                                        | 62/376  | (16.5) | 1.48 (0.55 – 4.01)  | 0.44             |
| 1-2 hours                                               | 119/873 | (13.6) | 1.30 (0.49 – 3.45)  | 0.60             |
| 2-4 hours                                               | 34/295  | (11.5) | 1.12 (0.40 – 3.12)  | 0.83             |
| More than 4 hours                                       | 5/49    | (10.2) | Ref                 |                  |
| <b>Daylight exposure summer (hours per day) (98.1%)</b> |         |        |                     |                  |
| Less than 1 hour                                        | 17/43   | (39.5) | 5.00 (2.42 – 10.32) | <b>&lt;0.001</b> |

|                                                             |          |        |                    |                  |
|-------------------------------------------------------------|----------|--------|--------------------|------------------|
| 1-2 hours                                                   | 47/185   | (25.4) | 2.70 (1.78 – 4.10) | <b>&lt;0.001</b> |
| 2-4 hours                                                   | 97/640   | (15.2) | 1.56 (1.12 – 2.25) | <b>0.01</b>      |
| More than 4 hours                                           | 65/735   | (10)   | Ref                |                  |
| <b>Birth season (100%)</b>                                  |          |        |                    |                  |
| Spring                                                      | 62/400   | (15.5) | 1.92 (1.14 – 3.23) | <b>0.015</b>     |
| Summer                                                      | 64/434   | (14.7) | 1.52 (0.90 – 2.58) | 0.12             |
| Autumn                                                      | 67/442   | (15.2) | 1.63 (0.97 – 2.76) | 0.07             |
| Winter                                                      | 39/350   | (11.1) | Ref                |                  |
| <b>Use of nightlight (under the age of 2 years) (97.0%)</b> |          |        |                    |                  |
| Sleep with night light                                      | 42/356   | (11.8) | 1.42 (0.96 – 2.10) | 0.08             |
| Sleep without night light                                   | 177/1237 | (14.3) | Ref                |                  |
| <b>Child factors</b>                                        |          |        |                    |                  |
| <b>When born (97.0%)</b>                                    |          |        |                    |                  |
| On time                                                     | 190/1428 | (13.3) | 0.83 (0.48 – 1.44) | 0.52             |
| Early by more than 3 weeks                                  | 18/121   | (13.3) | Ref                |                  |
| Birthweight myopic (mean±SD) = 3.45±0.66Kg (84%)            | 165/1364 | (12.4) | 0.95 (0.74 – 1.24) | 0.72             |
| Breast fed only for first 3 months (98.0%)                  | 98/620   | (15.8) | 0.90 (0.63 – 1.30) | 0.59             |
| Bottle fed only for first 3 months                          | 66/651   | (10.1) | 0.54 (0.37 – 0.80) | <b>0.002</b>     |
| Combined breast and bottle fed for first 3 months           | 54/314   | (17.2) | Ref                |                  |
| BMI (mean±SD) = 20.60±4.17Kg/m <sup>2</sup> (99.9%)         |          |        | 1.14 (1.10 – 1.18) | <b>&lt;0.001</b> |
| <b>BMI group (99.9%)</b>                                    |          |        |                    |                  |
| Healthy weight                                              | 139/1193 | (11.6) | 0.37 (0.26 – 0.54) | <b>&lt;0.001</b> |

|                                             |         |         |                    |              |
|---------------------------------------------|---------|---------|--------------------|--------------|
| Overweight                                  | 45/249  | (18.1)  | 0.63 (0.39 – 0.99) | <b>0.04</b>  |
| Obese                                       | 48/136  | (35.3)  | Ref                |              |
| <b>Height (99.9%)</b>                       |         |         |                    |              |
| 6-7 years height (mean±SD) =126.06±6.86mm   | 27/728  | (3.7)   | 1.02 (1.01 – 1.04) | <b>0.01</b>  |
| 12-13 years height (mean±SD) =159.84±9.21mm | 204/897 | (22.7)  | 1.02 (1.01 – 1.03) | <b>0.004</b> |
| <b>Diet (98%)</b>                           |         |         |                    |              |
| <b>Fresh fruit</b>                          |         |         |                    |              |
| >1/day                                      | 101/722 | (14.0)  | 0.93 (0.46 – 1.90) | 0.84         |
| 1/day                                       | 54/426  | (12.7%) | 0.77 (0.37 – 1.62) | 0.48         |
| Most days                                   | 25/209  | (12.0)  | 0.60 (0.27 – 1.35) | 0.22         |
| 1/week                                      | 18/113  | (15.9)  | 0.75 (0.32 – 1.77) | 0.51         |
| Never                                       | 18/106  | (16.9)  | Ref                |              |
| <b>Green vegetables</b>                     |         |         |                    |              |
| >1/day                                      | 36/206  | (17.5)  | 1.62 (0.83 – 3.16) | 0.16         |
| 1/day                                       | 62/452  | (13.7)  | 1.27 (0.68 – 2.36) | 0.45         |
| Most days                                   | 61/412  | (14.8)  | 1.39 (0.75 – 2.59) | 0.30         |
| 1/week                                      | 30/261  | (11.5)  | 0.90 (0.39 – 2.06) | 0.80         |
| Never                                       | 27/255  | (10.6)  | Ref                |              |
| <b>Fish</b>                                 |         |         |                    |              |
| >1/day                                      | 3/19    | (15.8)  | 1.71 (0.43 – 6.68) | 0.44         |
| 1/day                                       | 2/18    | (11.1)  | 1.16 (0.24 – 5.68) | 0.24         |
| Most days                                   | 17/82   | (20.7)  | 2.06 (1.05 – 4.03) | <b>0.04</b>  |
| 1/week                                      | 102/737 | (13.8)  | 1.25 (0.83 – 1.89) | 0.29         |

|                                   |          |        |                     |                  |
|-----------------------------------|----------|--------|---------------------|------------------|
| Never                             | 92/730   | (12.6) | Ref                 |                  |
| <b>Parental factors</b>           |          |        |                     |                  |
| Parental myopia                   |          |        |                     |                  |
| Father myopic (93%)               | 84/382   | (22.0) | 2.4 (1.80 – 3.30)   | <b>&lt;0.001</b> |
| Father not myopic                 | 117/1130 | (10.4) | Ref                 |                  |
| Mother myopic (95.3%)             | 76/493   | (15.4) | 1.23 (0.91 – 1.62)  | 0.22             |
| Mother not myopic                 | 136/1056 | (12.9) | Ref                 |                  |
| <b>Parental education</b>         |          |        |                     |                  |
| Mothers educational level (91%)   |          |        |                     |                  |
| Primary                           | 4/42     | (9.5)  | 0.81 (0.27 – 2.420) | 0.71             |
| Secondary                         | 51/442   | (11.5) | 0.82 (0.58 – 1.17)  | 0.28             |
| Third level                       | 143/987  | (14.5) | Ref                 |                  |
| Fathers educational level (88.5%) |          |        |                     |                  |
| Primary                           | 3/44     | (6.8)  | 0.61 (0.18 – 2.09)  | 0.43             |
| Secondary                         | 56/466   | (12.0) | 0.97 (0.68 – 1.38)  | 0.87             |
| Third-level                       | 121/839  | (14.4) | Ref                 |                  |

*N*: number of participants; *CI*: confidence intervals, *SD*: standard deviation, *BMI*: body mass index, *Ref*: reference category, Significant *P* values highlighted in bold.
